# Supplementary material for: Exploring social exclusion through immersive virtual reality: a qualitative comparison with the Cyberball paradigm in children and adolescents
Source: Springer Nature journal article supplement (doi:10.1007/s10212-025-01059-w), 2026-01-28
Supplement: MOESM1 [file 10212_2025_1059_MOESM1_ESM.docx]

SUPPLEMENTARY MATERIAL 1: FINAL DEBRIEFING AND OPEN-ENDED QUESTION

Our experiment is over, we thank you for participating. We want to take this moment to give you some important information about this experiment. The aim of the research was not to compare two video games with different technological modes, as was explained to you at the beginning, but actually, the aim was to see which of the two games was more able to let you feel excluded by other students of the same age as you. In order for the simulation to be as realistic as possible, we had to tell you at the beginning of each experiment that the other two online participants were students of your age who were carrying out the same experiment at the same time from two other schools in Emilia Romagna. Actually, the other two participants were two digital avatars that followed specific commands established before the experiment, and their actions towards you were the same for all of you, so you all interacted with the exact same avatars that behaved in the exact same way with all of you. This is the main reason why we asked you, at the end of each individual experiment, not to talk to your classroom and school mates about the experiment for any reason until the total experiment was over for all students in the school. Now, wanting to have the most reliable data possible, we would like to ask you to please be truthful and tell us if you heard any details or any information about the experiment from other mates before running the experiment yourself so that we can mark your participation code and add this information to the database. Finally, we would like to tell you that we remain at your disposal if you would like a one-to-one meeting for further clarifications or if you have any specific questions for us. If you need this, just ask your teachers and we, through them, will arrange a meeting with you here at school. Also, when we have analysed the data and obtained the results, we will organize, together with the headmaster, a meeting with you, your teachers and parents, to better explain what we have done and what we have achieved.

- **Thinking about the moment when you entered the virtual reality through the headset, what would you do to improve that situation/interaction and make it more realistic within the virtual environment?**

Supplement 2: CYBERBALL PARADIGM INSTRUCTIONS AND OPEN-ENDED QUESTIONS

We will now let you enter an online platform where you will play with two other students of your age from two other schools in Emilia Romagna who are carrying out the same experiment at the same time. Before you enter, you will have the chance to enter your name and a picture of yourself taken through the computer's webcam, and the other two players will do the same, so that all three of you can see your names and pictures next to your avatar. The game consists of passing a ball between all players. Each time the ball comes to you, you will have to use the right arrow to pass it to the student on your right and, vice versa, the left arrow to pass it to the student on your left. Before you start the real game with the other two students, we'll give you a quick one-shot test to make sure you understand how the controls work. Then we'll quickly contact our colleagues in the other two schools to make sure the other two students are ready, and once all three of you are ready, we'll let you go ahead and you can start playing.

- **What did you like about the game?**
- **What did you dislike about the game?**

SUPPLEMENT 3: VIRTUAL REALITY PARADIGM INSTRUCTIONS AND OPEN-ENDED QUESTIONS

We will now take you into a three-dimensional environment built through virtual reality using a headset. Once you have put on the headset, you will find yourself sitting in a virtual classroom together with two other students of your age from two other schools in Emilia Romagna, who are carrying out the same experiment at the same time, and who will be seated on the other sides of the desk. The virtual environment is ready and set up, once we have quickly heard from our colleagues in the other two schools to make sure that the other two students are ready. We will let you enter the virtual environment through the headset and give you two minutes to orient yourself inside the virtual environment and look around. After two minutes you can start to interact. In the meantime, we ask you to think of an interesting activity that you have done at school recently or in the previous months, whether in school or out of school, because this will be the topic that we want you to talk about with the others: we want each of you to share a school activity that you find interesting and discuss it among yourselves. The only two recommendations we make to you is to try to intervene when the other two are not talking and when they deliberately ask you to speak or turn towards you, so as to avoid talking over each other in order for the conversation not to become chaotic, and to stay seated all the time avoiding to walk in the VR room, as you can risk falling in the real environment. To avoid any problems and provide you with more security, we will monitor you via computer during the entire time you are inside the virtual environment. When the time for talking is over, we will interrupt the connection with the virtual environment and notify you so that you know when you can take off the headset. We ask you to actively and attentively participate in the conversation with the other two students because once you have exited virtual reality, we will ask you again to fill out a questionnaire, this time containing information about your experience in the virtual environment and what you talked about inside.

- **What did you like about the game?**
- **What did you dislike about the game?**

SUPPLEMENTARY MATERIAL 4: VR PARADIGM SCRIPTS

LEVEL: EXCLUSION- CHILD (8-10)

Child 1 (Luca): Hi! I am Luca. And what's your name? (Referred to participant) (Enthusiasm, curiosity) Participant: (avatars look at the participant who introduces himself)

Child 1 (Luca) Hi! What's your name (referring to the avatar)? Child 2 (Martina): Hi! I am Martina! (Joy, enthusiasm)

Child 1 (Luca): What's the last interesting thing you did at your school?

Child 2 (Martina): Mmh, I don't know... the first thing that comes to mind is a trip we took to nature to do a science project. We went to a forest and saw the trees and the animals there! (Enthusiasm)

Child 1 (Luca): Wow! What about you? (Referred to participant) Participant: (avatars look at the participant answering the question)

Child 1 (Luca): Aah, OK. Martina how lucky you are to have done this so interesting thing. I like nature so much and I like discovering new things about plants and animals. (Admiration, interest)

Child 2 (Martina): Yes! It was really great! We saw a beautiful forest. There were very tall trees and we saw lots of animals living there (Enthusiasm, Wonder)

Child 1 (Luca): And what did you do while visiting the forest? Did you see any particular animals? (Curiosity, interest)

Child 2 (Martina): Yes! We saw how different trees are from each other and how they have leaves and bark. It was wonderful to discover that each tree has its own history and its own important role in the forest. We also saw many animals, like squirrels jumping and colourful birds in the trees (Enthusiasm, Wonder)

Child 1 (Luca): Wow! That sounds really a too good experience! My dream is to be able to see a forest like that one day. It must have been amazing to observe animals in nature. (Admiration)

Child 2 (Martina): Yes, it was a magical moment! We were surrounded by nature and didn't hear the noise of the city. I loved hearing the sound of the leaves and the birds singing. I felt like a real explorer!

(Happiness, nostalgia)

Child 1 (Luca): How nice! I also like nature and I like being outdoors. When I'm in nature, I feel immersed in the world around us. (Sharing, reflection)

Child 2 (Martina): True! Nature inspires us and makes us feel part of something bigger. Although at the

beginning I was a bit afraid of soiling my clothes or tripping over tree roots, I learnt to be brave. Now I am no longer afraid and I have had a lot of fun. I realised that it's important to be in

nature even if you can fall, because even if you get hurt it doesn't hurt forever! (Sharing, Gratitude)

Child 1 (Luca): What bravery, Martina! You are a real explorer! How nice that you were lucky enough to do something so special. (Admiration, happiness)

Child 2 (Martina): Thank you, Luca. And have you done anything nice at school lately? (Curiosity, interest)

Child 1 (Luca): Mmh... A while ago we did an art project in which we created paintings. We used a lot of colours and drew our landscapes, towns and typical things. It was like travelling through our region. (Enthusiasm, pride)

Child 2 (Martina): How nice, Luca! I love art too! I would like to see your little works to know the places and what you have drawn. Did you add anything special to your artwork? (Curiosity, interest)

Child 1 (Luca): Yes! In the paintings I drew the historical houses and buildings of the cities, such as medieval towers and Renaissance palaces. I also drew the typical things we eat, like tortellini and Parmesan cheese. I tried to draw everything precisely so that those who see my drawings can recognise our region.

(Enthusiasm, pride )

Child 2 (Martina): How beautiful! Surely your drawings are beautiful and show the beautiful things of our region. It would be nice to see them up close. Maybe you can ask the teachers to organise an exhibition with your artwork! (Enthusiasm, curiosity, reflection)

Child 1 (Luca): What a great idea! It can be done to show how beautiful our drawings are, not only to our schools, but also to other people who might see how good we are. We have to talk to the teachers and see if it can be done! That would be really great! (Enthusiasm, determination)

Child 2 (Martina): You're right, Luca! You have to beg your teachers to do this. It will be a unique experience! (Enthusiasm, determination)

Child 1 (Luca): Yes! We should also ask all the other children and all the teachers at our school. We could do things together during the exhibition, like start painting all together. That way we can show the others how nice it is to paint too. (Enthusiasm, sharing)

Child 2 (Martina): What a fantastic idea, Luca! I'm sure many children will be happy to participate and try their hand at painting. (Enthusiasm, desire to learn)

Child 1 (Luca): True! We need to have an exhibition where not only the children from our school but

everyone can participate. We can get the families and the townspeople to come and invite them to see our handicrafts! (Determination, Pride)

Child 2 (Martina): I really like your idea! It would be too nice to see all the habitants looking at the school's handiworks and admiring what you have done. (Appreciation)

LEVEL: EXCLUSION- PRE-ADOLESCENT (11- 13)

Boy 1 (Sara): Hi! I'm Sara! (Enthusiasm)

Boy 2 (Angelo): Hi Sara! I'm Angelo, nice to meet you! And what's your name? (Happiness) Participant: (avatars turn to look at the participant introducing themselves)

Boy 1 (Sara): What was the last activity you did at school? (Curiosity)

Boy 2 (Angel): I don't know... I don't think it's interesting, but the last thing we did was a maths workshop. (Emphasis and enthusiasm)

Boy 1 (Sara): Ah, nice, what about you? (Referred to participant) Participant: (avatars turn to look at the responding participant)

Boy 1 (Sara): Ah, OK. Wow, Angelo, your lab sounds really interesting! I really like maths. What have you been up to? (Curiosity)

Boy 2 (Angel): We did fractions in a whole new way! We learnt how to add, subtract, multiply and divide fractions in ways I never imagined. (Excitement)

Boy 1 (Sara): Really! And how? I like solving problems, but fractions seem really interesting. How did you do it? (Interest)

Boy 2 (Angelo): It was a lot of fun! Our teacher proposed maths games where we had to divide food

between friends and divide spaces. We solved everyday problems using fractions and discovered how they can be useful in everyday life. It was really fun! (Excitement)

Boy 1 (Sara): Wow, that sounds really interesting! I guess it was a fun assignment! (Admiration)

Boy 2 (Angel): Absolutely, Sara! It was an incredible experience. I learnt that fractions are useful and can simplify our lives. I was really happy to discover all that! (Enthusiasm and elation)

Boy 1 (Sara): I'm happy for your experience! It's great when we can learn while having fun and use the knowledge in real life. (Satisfaction)

Boy 2 (Angel): Yes, that's really great! And you, Sara, what was the last thing you did at your school? (Curiosity)

Boy 1 (Sara): Mmh, I can think of a science project on the human body. It was really interesting! (Enthusiasm)

Boy 2 (Angel): Wow, that sounds cool! I'd like to understand how our bodies work. What exactly did you do? (Curiosity)

Boy 1 (Sara): We studied the various systems of the human body, such as the digestive system, the

circulatory system and the respiratory system. We also built a three-dimensional model of the human body to better understand what each organ does. It was a really great experience! (Wonder)

Boy 2 (Angelo): That must have been really exciting! I like the idea of studying the human body and understanding how it works. Our body is incredible! (Admiration)

Boy 1 (Sara): That's right, I really agree! It was a great way to learn! (Enthusiasm) Boy 2 (Angel): It sounds really incredible! What did you like the most? (Curiosity)

Boy 1 (Sara): The brain and the nervous system. It was amazing to discover that the brain receives

information and sends signals through the nervous system to make us move and think. (Wonder and excitement)

Boy 2 (Angel): Wow, I can't even imagine how much fun that was! I didn't know that the brain influences our thinking and behaviour. Did you also do any hands-on activities? (Interest)

Boy 1 (Sara): Yes. We were divided into groups and each of us was able to investigate a specific system of the human body. My group focused on the skeletal system. (Interest)

Boy 2 (Angel): Ah, beautiful! And what exactly did you do? (Curiosity)

Boy 1 (Sara): We examined the bones, learning their names and functions. We also looked at the

importance of the joints and muscles that enable us to move. But the most interesting part was when we created a model of the skeletal system with recycled materials. (Enthusiasm)

Boy 2 (Angel): What a great idea! I'm sure it was a lot of fun. How did you make the model? (Curiosity)

Boy 1 (Sara): We used various materials, such as cardboard, toothpicks and paint. We built the skeleton so that it stood straight and we could see all the parts, such as the skull, vertebrae, ribs and limb bones. It was fascinating to see how all these bones connect and form the structure of our body. (Wonder and

excitement)

Boy 2 (Angel): It must have been really nice to see your finished model. (Admiration)

Boy 1 (Sara): Absolutely! Every time we looked at our model, we thought our body looked like that. Also, they explained to us how important it is to eat well and exercise. (Satisfaction)

Boy 2 (Angelo): I'm sure this experience has made you learn a lot of new things. This is really great! (Pride)

Boy 1 (Sara): Thank you, Angelo! It was a very important project. Now I'm even more interested in the human body and science. (Enthusiasm)

LEVEL: EXCLUSION- ADOLESCENT (14-16)

Boy 1 (Alessandra): Hey, hi! My name is Alessandra. And you?

Boy 2 (Davide): Hi Alessandra! I'm Davide, nice to meet you! And you? (Happiness) Participant: (avatars look at the participant who introduces himself)

Boy 1 (Alessandra): How are you? Have you done anything interesting at school lately? (Curiosity)

Boy 2 (Davide): Mmh, I don't know. The last thing I can think of is a scientific lab project on the effect of sunlight on plants. We looked at how light affects the growth and development of plants. It was an

interesting topic to explore! (Enthusiasm)

Boy 1 (Alessandra): Hmm, got it. How about you? Participant: (avatars look at the responding participant)

Boy 1 (Alessandra): Ah, OK. Wow, Davide! Your project sounds really interesting! How did you structure your experiment? (Curiosity)

Boy 2 (Davide): We created suitable conditions for sunlight exposure for a group of identical plants. Some

plants were placed in full sunlight, while others were placed in a shaded area. We left some plants indoors, away from direct sunlight. During the experiment, we measured the plants' growth, number of leaves,

height and general health. We wanted to understand the effects of sunlight on plants.

Boy 1 (Alessandra): Wow, that sounds like a really good experiment! And what were your discoveries? What did you learn? (Curiosity)

Boy 2 (Davide): It was really interesting! We noticed that the plants exposed to direct sunlight grew more

than the plants in the shade. The plants exposed to sunlight had stronger stems and bigger, greener leaves. In contrast, the plants in the shade showed slower growth and the leaves were paler. We also observed that the indoor plants grew very weak and had yellow leaves. (Thrill of discovery)

Boy 1 (Alessandra): Wow! So, direct sunlight makes plants grow and develop better. I never thought about how important sunlight is. (Wonderful)

Boy 2 (Davide): Exactly! It is amazing how light, which we often take for granted, plays such an important role in plant life. This experiment gave us a better understanding of the relationship between plants and the environment. It is as if we have unlocked a little secret of nature! (Wonder)

Boy 1 (Alessandra): I am really happy that you shared this experience with me, Davide. It's great to see how science allows us to discover the world. (Satisfaction)

Boy 2 (Davide): I too am happy that I was able to share my project with you, Alessandra. I discovered how exciting science can be. (Pride)

Boy 1 (Alessandra): I totally agree! We did an equally interesting science workshop. We focused on sets and graphs. (Interest)

Boy 2 (Davide): Ah cool! And how did you feel about doing sets and graphs? (Curiosity)

Boy 1 (Alessandra): It was difficult but at the same time exciting. In each set, we entered data. Afterwards, we used software to analyse the data and create the graphs. It was amazing to discover that data can be represented with graphs, which allowed us to discover new things about the phenomenon we were observing. (Enthusiasm)

Boy 2 (Davide): Interesting! I like the idea of working with graphic designers. It would be great if we could exchange our work to see what we've done! (Enthusiasm)

Boy 1 (Alessandra): Yes, that would be really interesting! Then between us we could share our experiences, discuss our discoveries and learn even more from each other. (Curiosity)

Boy 2 (Davide): Wow cool! I guess you enjoyed it. It's important to compare and take cues from each other. (Enthusiasm)

Boy 1 (Alessandra): I agree! Science is very interesting and we should appreciate it more because it allows us to know ourselves and the world. (Passion)

Boy 2 (Davide): You're right, Alessandra. It's wonderful to see how science can help us to learn new things. (Marvel)

Boy 1 (Alessandra): Exactly! There are so many situations where you can use science (Enthusiasm)

Boy 2 (Davide): I'm sure the projects we've done are incredible. It's interesting to see how each time you get a different result. (Interest)

LEVEL: INCLUSION-CHILD (8-10)

(Child 1 - Andrea): Hello! My name is Andrea (enthusiasm). I am really curious to meet you.

(Child 2 - Clara): Hi Andrea! I'm Clara (happiness). I'm happy to meet you too. And what's your name? Participant: (avatars look at the participant who introduces himself)

(Child 1 - Andrea): Did you do something interesting at school? Something that really excited you? (curiosity)

(Child 2 - Clara): Well, actually yes! I can think of a really exciting little science project. We built a volcano and made it erupt using special ingredients. It was spectacular! (enthusiasm)

(Child 1 - Andrea): Wow! What about you?

Participant: (avatars look at the participant answering and continue to look at him referring to him in subsequent questions)

(Child 1 - Andrea): Wow, that sounds really interesting! Can I ask you what you did specifically? (curiosity) Participant: (avatars look at the responding participant)

(Child 2 -Clara): How nice! And how was it for you? (Curiosity)

Participant: (avatars look at the responding participant)

(Child 1 - Andrea): I guess. Clara, what did you do specifically? (Curiosity)

(Child 2 - Clara): We mixed liquids and substances that the teachers gave us and explained how to mix, what to put before and after inside the volcano, and at the end we poured hot water to make the lava come out. It was amazing to see the smoke and fake lava coming out of the volcano! (enthusiasm)

(Child 1 - Andrea): That sounds really exciting! It must have been a lot of fun. How did you feel when you saw the lava coming out of the volcano? (Curiosity)

(Child 2 - Clara): I felt so excited and happy! It was like I was a real scientist doing experiments. I like it when we can do practical things instead of just listening to the teachers. (joy)

(Child 1 - Andrea): I'm so glad you had such a good time. And have you ever done a science project like that? Would you like to build a volcano? (Addressed to participant)

Participant: (avatars look at the responding participant)

Child 1 - Andrea): Understood. Clara, did you have any difficulty building the volcano? (interest)

(Child 2 - Clara): At first, I was a bit confused about how to do it and how to put together all the materials the teachers had given us. I felt a bit down because I wanted everything to go well. But then I asked the

teacher for help and she slowly explained how to do it. I felt better when I understood how to do it. (initial confusion, relief)

(Child 1 - Andrea): Good thing you asked for help and your teacher helped you. (approval)

(Child 2 - Clara): Yes, at first I was a bit shy and didn't want to ask for help, but then I realised it was really necessary. After I did it, I felt much better! (realisation, relief) What would you have done in my place? (addressed to participant)

Participant: (avatars look at the responding participant)

(Child 2 - Clara): I guess. What about you, Andrea? Did you do anything interesting at school? (Curiosity)

(Child 1 - Andrea): Mmh, the last interesting thing I remember was a nature trip last week. We went to a park and saw lots of plants and animals. It was wonderful! I felt happy and amazed the whole day. (happiness, wonder)

(Child 2 - Clara): Wow, that sounds really good! I would love to do something like that. That must have been really interesting. (admiration)

(Child 1 - Andrea): It was fantastic! I was fascinated by the beauty of nature. It was like entering a new world! (admiration, wonder) It was like there were so many new things to see that I had never seen before. I felt really lucky to see that park. (Gratitude)

(Child 2 - Clara): You make me too curious. Have you ever done a similar trip with the school to a park? (Addressed to participant)

Participant: (avatars look at the responding participant)

(Child 2 - Clara): I see. Andrea, what kind of animals did you see on the trip? (Curiosity)

(Child 1 - Andrea): We saw so many different animals! There were colourful birds, squirrels hopping around in the trees and even a family of fawns running around in the middle of the park. It was exciting to be able to observe the animals so closely. (enthusiasm)

(Child 2 - Clara): Wow, you made me want to take a trip to the park too! How did you feel while observing the animals? (Curiosity)

(Child 1 - Andrea): I felt incredibly lucky and fascinated. Every time I saw an animal and could approach it without fear I felt a wonderful and mysterious world. It was a day all about nature. (wonder, connection)

(Child 2 - Clara): It sounds like a magical experience! I would love to have the chance to watch the animals so closely. It's like living inside nature. (enthusiasm)

(Child 1 - Andrea): It really is an amazing adventure! I discovered that it's wonderful to spend so much time inside a park where there are only plants and animals. I felt so lucky, don't you agree? (appreciation)

Participant: (avatars look at the responding participant)

(Child 2 - Clara): It's really true, they are wonderful experiences, and I'm so glad we told each other these stories! (Gratitude)

(Child 1 - Andrea): I too am happy to have talked to you. It's nice to talk about our experiences and see how curious we are about the world around us. (satisfaction)

LEVEL: INCLUSION - PRE-ADOLESCENT (11-13)

Boy 1 (Giulia): Hi! I'm Giulia, and you? (enthusiasm)

Boy 2 (Eugenio): Hi! I'm Eugenio, pleased to meet you! And you? (enthusiasm) Participant: (avatars look at the participant who introduces himself)

Boy 1 (Giulia): Nice to meet you! What have you been up to at school? Participant: (avatars look at the responding participant)

Boy 1 (Giulia): That sounds very interesting! And what exactly did you do? Participant: (avatars look at the responding participant)

Boy 2 (Eugenio): Cool! And how did it feel?

Participant: (avatars look at the responding participant) Boy 1 (Giulia): I can imagine. And you, Eugenio?

Boy 2 (Eugenio): I don't know, it occurs to me that we took a trip to the natural science museum last year. We were able to see and learn new things about plants, animals and rocks. It was a lot of fun! (enthusiasm)

Boy 1 (Giulia): Wow, that sounds really interesting! I'd like to be able to go to a natural science museum too. Have you ever seen a natural science museum? (Addressed to participant)

Participant: (avatars look at the responding participant)

Boy 1 (Giulia): Understood. What was the best part of the visit for you, Eugenio? (Curiosity)

Boy 2 (Eugenio): Well, one of the most beautiful things was seeing the fossils and learning more about our planet. It's amazing how many things there are in nature and how many animals exist. Do you like nature? (admiration)

Participant: (avatars look at the responding participant)

Boy 1 (Giulia): I really like looking at animals and plants. Nature is beautiful! We took a trip to the cookery workshop. We learnt how to make homemade pasta, gnocchi and many other dishes. It was fun kneading and then eating what we had made! (enthusiasm)

Boy 2 (Eugenio): How nice! I like the idea of learning to cook something good to eat. How about you? Do you like the idea of cooking? Have you ever done a cooking workshop?

Participant: (avatars look at the responding participant) Boy 2 (Eugenio): OK, did you have fun?

Boy 1 (Giulia): Yes! I had a really good time. It was a different trip from the others, and everything we ate tasted even better knowing that we had prepared it ourselves! (enthusiasm)

Boy 2 (Eugenio): Wow, that sounds really fun! Cooking will definitely be a unique experience and I would like to go on this trip too. What have you prepared? (curiosity)

Boy 1 (Giulia): We learnt how to make homemade pasta, gnocchi and much more. We used fresh ingredients such as mushrooms and spinach, but the most fun part was making the gnocchi! (enthusiasm) We were helped by a very good chef who explained how we had to move our hands to give the gnocchi a perfect shape. It was so much fun! (enthusiasm)

Boy 2 (Eugenio): I envy you. We've never been taken to a cookery workshop. Did you eat the things you prepared? (curiosity)

Boy 1 (Giulia): Of course! After we finished cooking, we ate everything. It was like a reward for our work. Maybe they looked even better to us because we had made them. (satisfaction) It was a really incredible experience and, in particular, my companions and I laughed a lot. The

chef also explained to us that cooking is part of every region's culture and that a simple dish of pasta can unite even the most diverse people. (satisfaction)

Boy 2 (Eugenio): You're right, thinking about it, cooking is also important because it's part of the tradition. What do you think?

Participant: (avatars look at the responding participant)

Boy 2 (Eugenio): OK, it's nice that you were able to share this experience with your classmates.

(appreciation). The most beautiful part must have been kneading with your hands! Did you find it difficult?

Boy 1 (Giulia): Some things were a bit complicated, but the chef had a lot of patience and was always behind us. In the end, we all managed to prepare delicious dishes! (satisfaction)

Boy 2 (Eugenio): How nice to learn this way. Maybe one day you and your mates could all cook dinner together. (enthusiasm)

Boy 1 (Giulia): Yeah, that would be really fun! I’m looking forward! (enthusiasm)

LEVEL: INCLUSION-ADOLESCENTS (14-16)

Boy 1 (Nicola): Hi! I'm Nicola. What are your names?

Boy 2 (Caterina): Hi! I'm Caterina, nice to meet you! And you?

Participant: (avatars turn to look at the participant introducing themselves)

Boy 1 (Nicola): Nice to meet you! What's the last interesting thing you two did at school?

Boy 2 (Caterina): Well, I think the most interesting one was a science project where we explored the environment of our city. It was very cool! (enthusiasm)

Boy 1 (Nicola): Nice! We did a cool project too, but in technology, where we programmed and developed a little game. What did you do? (Curiosity)

Participant: (avatars look at the participant answering and continue to look at him referring to him in subsequent questions)

Boy 1 (Nicola): That sounds very interesting, what did you do specifically? (Curiosity) Participant: (avatars look at the participant while responding)

Boy 2 (Caterina): I see. Did you enjoy it? What did you feel at that moment? (Curiosity) Participant: (avatars look at the participant while responding)

Boy 1 (Nicola): I can imagine. And you, Caterina, what exactly did you do in your project? (Curiosity)

Boy 2 (Caterina): We learnt to recognise the species of plants and animals in our city. We also visited a nature park to directly observe the environment. It was really interesting to discover how each species performs a specific function! (enthusiasm)

Boy 1 (Nicola): Wow, that sounds really interesting! I like the idea of exploring the environment and seeing what it's like. Have you ever done anything similar with the school?

Participant: (avatars look at the responding participant)

Boy 1 (Nicola): Understood. How did you feel during the project? (Curiosity)

Boy 2 (Caterina): I felt very involved. It was like being a real scientist, observing nature, collecting data and doing experiments. I also liked it when we reconstructed the environment ourselves to better understand how it works! (enthusiasm)

Boy 1 (Nicola): Nice! The technology project we did was interesting as well. We created a little game using computer algorithms. (enthusiasm)

Boy 2 (Caterina): Top that cool! They never made us use algorithms. Did you guys ever do anything about computer science at school?

Participant: (avatars look at the responding participant)

Boy 2 (Caterina): OK, Nicola, did you find it difficult? (Curiosity)

Boy 1 (Nicola): A little bit, to be honest, but then I had fun. It was fun to create characters, levels and challenges. I also enjoyed solving the problems that arose and improving the game! (enthusiasm)

Boy 2 (Caterina): That's really interesting! I like the idea of developing a game using programming. It would be great if they made us do it too. (enthusiasm)

Boy 1 (Nicola): Yes, it would be really useful, even as an alternative activity to the usual school lessons. What do you think? (satisfaction)

Participant: (avatars look at the responding participant)

Boy 1 (Nicola): I see, in the meanwhile I was thinking, Caterina, have you ever thought of proposing this project to your teachers? It could be a fun way to learn and put digital knowledge into practice! (Curiosity)

Boy 2 (Caterina): Good idea! We should definitely talk to them and see if there is a possibility of introducing a similar project in our school. I'm convinced that many of our classmates would love to participate! Wouldn't you be happy if they asked you? (enthusiasm)

Participant: (avatars look at the responding participant)

Boy 1 (Nicola): I'm sure that if you can present your project convincingly, your teachers will be happy to give you this opportunity. You just have to make sure you are convincing (determination) Do you have any ideas for being convincing?

Participant: (avatars look at the responding participant)

Boy 2 (Caterina): Exactly! We have to show them how motivated we are. I think we could also involve the other kids from the school, forming a small team to develop the game together. (enthusiasm)

Boy1 (Nicola): Yes, it would be great to work together with other students. You could exchange ideas, collaborate and learn even more. Maybe you could even enter a competition. (enthusiasm)

Boy 2 (Caterina): I like how you're thinking big! I’m looking forward to start organising. (determination)
