# Supplementary material for: Exploring social exclusion through immersive virtual reality: a qualitative comparison with the Cyberball paradigm in children and adolescents
Source: Springer Nature journal article supplement (doi:10.1007/s10212-025-01059-w), 2026-01-28
Supplement: MOESM2 [file 10212_2025_1059_MOESM2_ESM.docx]

DEBRIEFING FINALE CON DOMANDA A RISPOSTA APERTA

Il nostro esperimento è terminato, vi ringraziamo per aver partecipato. Vogliamo approfittare di questo momento per darvi delle importanti informazioni su quest’esperimento. La ricerca non ha come obiettivo il confronto tra due videogiochi con modalità tecnologiche diverse, come vi era stato spiegato all’inizio, ma in realtà l’obiettivo era quello di capire quale dei due giochi fosse più efficace nel farvi sentire esclusi da studenti che hanno la vostra stessa età. Per fare in modo che la simulazione fosse più realistica possibile, abbiamo dovuto dirvi all’inizio di ogni sperimentazione che gli altri due partecipanti online erano studenti della vostra età che stavano svolgendo lo stesso esperimento in contemporanea da altre due scuole dell’Emilia Romagna. In realtà gli altri due partecipanti erano due avatar digitali che seguivano dei comandi specifici e stabiliti prima dell’esperimento, e le loro azioni nei vostri confronti erano uguali per tutti quanti voi, quindi avete interagito tutti quanti con gli stessi identici avatar che si sono comportati nello stesso identico modo con tutti voi. Questo è il motivo principale per cui vi abbiamo chiesto, alla fine di ogni sperimentazione individuale con ognuno di voi, di non parlare tra voi dell’esperimento per alcun motivo fino a quando l’esperimento totale non sarebbe terminato. Adesso, volendo avere dei dati più veritieri possibili, vorremmo chiedervi per favore di essere sinceri e di dirci se avete sentito dettagli o qualunque informazione sull’esperimento da parte di altri compagni prima di eseguire voi stessi l’esperimento, così che noi possiamo segnare il vostro codice di partecipazione e aggiungere quest’informazione all’interno del database. Infine, vogliamo dirvi che restiamo a vostra disposizione nel caso in cui vorreste un incontro individuale per avere ulteriori chiarimenti o se avete delle domande specifiche per noi, per cui se ne avete bisogno, vi basterà chiedere ai vostri insegnanti referenti di questo progetto e noi, tramite loro, fisseremo un incontro con voi qui a scuola. Inoltre, quando avremo analizzato i dati e ottenuto i risultati, organizzeremo insieme al dirigente scolastico un incontro con voi, i vostri insegnanti e genitori, per spiegarvi meglio cosa abbiamo fatto e cosa abbiamo ottenuto.

- **Pensando alla fase in cui sei entrato nella realtà vituale tramite visore, cosa faresti per migliorare quella situazione/interazione e renderla più realistica dentro l'ambiente virtuale?**

ISTRUZIONI PARADIGMA CYBERBALL CON DOMANDA A RISPOSTA APERTA

Adesso ti faremo entrare in una piattaforma online dove giocherai con altri due studenti della tua età di altre due scuole dell’Emilia Romagna che stanno svolgendo lo stesso esperimento in contemporanea. Prima di entrare, avrai la possibilità di inserire il tuo nome e una tua foto acquisita tramite la webcam del computer, e gli altri due giocatori faranno la stessa cosa, così che tutt’e tre potrete vedere i vostri nomi e la vostra foto accanto al vostro avatar. Il gioco consiste nel passarvi una palla tra di voi. Ogni volta che la palla ti arriverà, dovrai usare la freccia destra per passarla allo studente alla tua destra e, viceversa, la freccia a sinistra per passarla allo studente alla tua sinistra. Prima di cominciare il gioco vero con gli altri due studenti, ti facciamo fare una prova veloce con un solo tiro per assicurarci che hai capito come funzionano i comandi. Dopodiché contatteremo rapidamente i nostri colleghi nelle altre due scuole per assicurarci che gli altri due studenti siano pronti, e una volta che tutt’e tre sarete pronti, ti faremo entrare in questa piattaforma e potrete cominciare a giocare.

- **Cosa ti è piaciuto del gioco?**
- **Cosa non ti è piaciuto del gioco?**

ISTRUZIONI PARADIGMA REALTA’ VIRTUALE CON DOMANDA A RISPOSTA APERTA

Adesso ti faremo entrare tramite visore in un ambiente tridimensionale costruito attraverso la realtà virtuale. Una volta indossato il visore, ti troverai seduto in una classe virtuale insieme ad altri due studenti della tua età di altre due scuole dell’Emilia Romagna, che stanno svolgendo lo stesso esperimento in contemporanea, e che saranno seduti agli altri lati del banco. L’ambiente virtuale è già pronto e predisposto, una volta sentiti rapidamente i nostri colleghi nelle altre due scuole per essere sicuri che gli altri due studenti siano pronti, vi faremo entrare nell’ambiente virtuale tramite visore e vi daremo due minuti per orientarvi dentro l’ambiente virtuale e guardarvi attorno e tra di voi. Dopo due minuti potrete cominciare ad interagire. Ti chiediamo di pensare nel frattempo ad un’attività interessante che hai fatto a scuola ultimamente o nei mesi precedenti, che sia dentro la scuola o fuori dalla scuola, perché questo sarà l’argomento di cui vogliamo che parliate tra di voi: vogliamo che ognuno di voi tre condivida un’attività scolastica che ritenete interessante e che ne discutiate fra di voi. Le uniche due raccomandazioni che ti facciamo sono di provare a intervenire quando gli altri due non stanno parlando e quando te lo chiedono espressamente o si rivolgono/girano verso di te, così da evitare che parliate l’uno sopra l’altro e creare confusione, e di restare seduto tutto il tempo evitando girare per l’ambiente virtuale, altrimenti potresti rischiare di cadere nell’ambiente reale. Per evitare qualunque problema e fornirvi maggior sicurezza, noi vi monitoreremo tramite computer durante tutto il tempo in cui voi starete dentro l’ambiente virtuale. Quando il tempo per parlare sarà finito, interromperemo la connessione con l’ambiente virtuale e ti avviseremo in modo da sapere quando potrai toglierti il visore. Ti chiediamo di partecipare attivamente e con attenzione alla conversazione con gli altri due studenti perché una volta che sarai uscito dalla realtà virtuale, ti chiederemo nuovamente di compilare un questionario, stavolta contenente informazioni sulla tua esperienza nell’ambiente virtuale e su ciò di cui avete parlato all’interno.

- **Cosa ti è piaciuto del gioco?**
- **Cosa non ti è piaciuto del gioco?**

COPIONI PER IL PARADIGMA IN VR

LIVELLO: ESCLUSIONE – BAMBINO (8-10)

Bambino 1 (Luca): Ciao! Io sono Luca. E tu come ti chiami? (Riferito al partecipante) (Entusiasmo, curiosità)

Partecipante: (gli avatar guardano il partecipante che si presenta)

Bambino 1 (Luca) Ciao! Tu invece (Riferito all’avatar) come ti chiami?

Bambino 2 (Martina): Ciao! Io sono Martina! (Gioia, entusiasmo)

Bambino 1 (Luca): Qual è l’ultima cosa interessante che avete fatto a scuola da voi?

Bambino 2 (Martina): Boh, non so... la prima cosa che mi viene in mente è una gita che abbiamo fatto nella natura per fare un lavoretto di scienze. Siamo andati in un bosco e abbiamo visto gli alberi e gli animali che ci sono! (Entusiasmo)

Bambino 1 (Luca): Wow! E tu invece? (Riferito al partecipante)

Partecipante: (gli avatar guardano il partecipante che risponde alla domanda)

Bambino 1 (Luca): Aah, okay. Martina che fortuna che avete fatto questa cosa così interessante. Mi piace tanto la natura e mi piace scoprire cose nuove su piante e animali. (Ammirazione, interesse)

Bambino 2 (Martina): Si! È stato davvero stupendo! Abbiamo visto un bosco bellissimo. C’erano alberi altissimi e abbiamo visto tanti animali che vivono lì (Entusiasmo, meraviglia)

Bambino 1 (Luca): E cosa avete fatto durante la visita al bosco? Avete visto qualche animale particolare? (Curiosità, interesse)

Bambino 2 (Martina): Sì! Abbiamo visto come sono diversi gli alberi tra loro e come hanno le foglie e le cortecce. È stato bellissimo scoprire che ogni albero ha una sua storia e un suo ruolo importante nel bosco. Abbiamo anche visto molti animali, come scoiattoli che saltavano e uccellini colorati tra gli alberi (Entusiasmo, meraviglia)

Bambino 1 (Luca): Wow! Mi sembra un'esperienza davvero troppo bella! Il mio sogno è quello di poter vedere un bosco così un giorno. Deve essere stato fantastico osservare gli animali nella natura. (Ammirazione)

Bambino 2 (Martina): Sì, è stato un momento magico! Eravamo immersi nella natura e non sentivamo il rumore della città. Mi è piaciuto un sacco sentire il rumore delle foglie e il canto degli uccelli. Mi sembrava di essere una vera esploratrice! (Felicità, nostalgia)

Bambino 1 (Luca): Che bello! Anche a me piace la natura e mi piace stare all'aperto. Quando sono nella natura, mi sento immerso nel mondo che ci circonda. (Condivisione, riflessione)

Bambino 2 (Martina): Vero! La natura ci ispira e ci fa sentire parte di qualcosa di più grande. Anche se all'inizio avevo un po' di paura di sporcare i vestiti o di inciampare tra le radici degli alberi, ho imparato ad essere coraggiosa . Adesso non ho più paura e mi sono divertita tanto. Ho capito che è importante stare nella natura anche se puoi cadere, tanto anche se ti fai male non ti fa male per sempre! (Condivisione, Gratitudine)

Bambino 1 (Luca): Che coraggio, Martina! Sei proprio una vera esploratrice! Che bello che hai avuto la fortuna di fare una cosa così speciale. (Ammirazione, felicità)

Bambino 2 (Martina): Grazie, Luca. E tu hai fatto qualcosa di bello a scuola ultimamente? (Curiosità, interesse)

Bambino 1 (Luca): Boh… Un po’ di tempo fa abbiamo fatto un lavoretto artistico in cui abbiamo creato dei dipinti. Abbiamo usato tanti colori e abbiamo disegnato i paesaggi, le città e i le cose tipiche nostre. È stato come viaggiare nella nostra regione. (Entusiasmo, orgoglio)

Bambino 2 (Martina): Che bello, Luca! Anche a me piace tanto l’arte! Vorrei vedere i vostri lavoretti per sapere i posti e cosa avete disegnato. Hai aggiunto qualcosa di particolare nei tuoi lavoretti? (Curiosità, interesse)

Bambino 1 (Luca): Sì! nei dipinti ho disegnato le case e i palazzi storici delle città, come ad esempio le torri medievali e i palazzi rinascimentali. Ho anche disegnato le cose tipiche che mangiamo noi, tipo i tortellini e il parmigiano reggiano. Ho provato di disegnare tutto preciso così che chi vede i miei disegni può riconoscere la nostra regione. (Entusiasmo, orgoglio )

Bambino 2 (Martina): Che bello! Sicuramente i tuoi disegni sono bellissimi e fanno vedere le cose belle della nostra regione. Sarebbe bello poterli vedere da vicino. Magari puoi chiedere alle maestre di organizzare una mostra con i vostri lavoretti artistici! (Entusiasmo, curiosità, riflessione)

Bambino 1 (Luca): Che bella idea! Si può fare per far vedere quanto sono belli i nostri disegni, non solo alle nostre scuole, ma anche ad altre persone che potrebbero vedere quanto siamo bravi. Dobbiamo parlare con le maestre e vedere se si può fare! Sarebbe davvero fantastico! (Entusiasmo, determinazione)

Bambino 2 (Martina): Hai ragione, Luca! Devi pregare le tue maestre per fare questa cosa. Sarà un'esperienza unica ! (Entusiasmo, determinazione)

Bambino 1 (Luca): Si! Dobbiamo chiedere anche a tutti gli altri bambini e tutte le maestre della nostra scuola. Potremmo fare delle cose insieme durante la mostra, come iniziare a dipingere tutti insieme. Così possiamo far vedere quanto è bello dipingere anche agli altri. (Entusiasmo, condivisione)

Bambino 2 (Martina): Che idea fantastica, Luca! Sono sicura che molti bambini saranno felici di partecipare e provare a dipingere. (Entusiasmo, desiderio di apprendimento)

Bambino 1 (Luca): Vero! Dobbiamo fare una mostra dove possono partecipare non solo i bambini della nostra scuola ma tutti quanti. Possiamo far venire le famiglie e gli abitanti della città ed invitarli a vedere i nostri lavoretti! (Determinazione, Orgoglio)

Bambino 2 (Martina): Mi piace molto la tua idea! Sarebbe troppo bello vedere tutti gli abitanti che guardano i lavoretti della scuola e che ammirano quello che avete fatto. (Apprezzamento)

LIVELLO: ESCLUSIONE – PRE-ADOLESCENTE (11-13)

Ragazzo 1 (Sara): Ciao! Sono Sara! (Entusiasmo)

Ragazzo 2 (Angelo): Ciao Sara! Sono Angelo, piacere di conoscerti! E tu come ti chiami? (Felicità)

Partecipante: (gli avatar si voltano per guardare il partecipante che si presenta)

Ragazzo 1 (Sara): Qual è stata l'ultima attività che avete fatto a scuola? (Curiosità)

Ragazzo 2 (Angelo): Mmh … Non so… Non penso che sia interessante, ma l’ultima cosa che abbiamo fatto è stata un laboratorio di matematica. (Enfasi ed entusiasmo)

Ragazzo 1 (Sara): Ah, bello, e tu invece? (Riferito al partecipante)

Partecipante: (gli avatar si voltano per guardare il partecipante che risponde)

Ragazzo 1 (Sara): Ah, okay. Wow, Angelo, il tuo laboratorio sembra davvero interessante! Mi piace molto la matematica. Cosa avete fatto di bello? (Curiosità)

Ragazzo 2 (Angelo): Abbiamo fatto le frazioni in un modo tutto nuovo! Abbiamo imparato a sommare, sottrarre, moltiplicare e dividere le frazioni in modi che non avrei mai immaginato. (Eccitazione)

Ragazzo 1 (Sara): Addirittura! E come? Mi piace risolvere i problemi, ma le frazioni sembrano davvero interessanti. Come avete fatto? (Interesse)

Ragazzo 2 (Angelo): è stato molto divertente! La nostra insegnante ci ha proposto dei giochi matematici dove dovevamo dividere il cibo tra amici e dividere gli spazi. Abbiamo risolto problemi di tutti i giorni utilizzando le frazioni e scoperto come possono essere utili nella vita di tutti i giorni. È stato davvero divertente! (Eccitazione)

Ragazzo 1 (Sara): Wow, sembra davvero interessante! Immagino che sia stato un compito divertente! (Ammirazione)

Ragazzo 2 (Angelo): Assolutamente, Sara! È stata un'esperienza incredibile. Ho imparato che le frazioni sono utili e che possono semplificarci la vita. Sono stato davvero felice di scoprire tutto ciò! (Entusiasmo ed esaltazione)

Ragazzo 1 (Sara): Sono felice per la tua esperienza! È fantastico quando possiamo imparare divertendoci e usare le conoscenze nella vita reale. (Soddisfazione)

Ragazzo 2 (Angelo): Sì, è davvero fantastico! E tu, Sara, qual è stata l'ultima cosa che avete fatto nella vostra scuola? (Curiosità)

Ragazzo 1 (Sara): Boh, mi viene in mente un progetto di scienze sul corpo umano. È stato davvero interessante! (Entusiasmo)

Ragazzo 2 (Angelo): Wow, sembra figo! Mi piacerebbe capire come funziona il nostro corpo. Cosa avete fatto esattamente? (Curiosità)

Ragazzo 1 (Sara): Abbiamo studiato i vari sistemi del corpo umano, come il sistema digestivo, il sistema circolatorio e il sistema respiratorio. Abbiamo anche costruito un modello tridimensionale del corpo umano per capire meglio cosa fa ogni organo. È stata un'esperienza davvero fantastica! (Meraviglia)

Ragazzo 2 (Angelo): Deve essere stato davvero entusiasmante! Mi piace l'idea di studiare il corpo umano e capire come funziona. Il nostro corpo è incredibile! (Ammirazione)

Ragazzo 1 (Sara): Esatto, sono proprio d’accordo! È stato un modo fantastico per imparare! (Entusiasmo)

Ragazzo 2 (Angelo): Sembra davvero incredibile! Cosa ti è piaciuto di più? (Curiosità)

Ragazzo 1 (Sara): Il cervello e il sistema nervoso. È stato incredibile scoprire che il cervello riceve le informazioni e invia segnali attraverso il sistema nervoso per farci muovere e pensare. (Meraviglia ed eccitazione)

Ragazzo 2 (Angelo): Wow, non posso nemmeno immaginare quanto sia stato divertente! Non sapevo che il cervello influenzasse il nostro pensiero e il nostro comportamento. Avete fatto anche delle attività pratiche? (Interesse)

Ragazzo 1 (Sara): Si. Siamo stati divisi in gruppi e ognuno di noi ha potuto approfondire uno specifico sistema del corpo umano. Il mio gruppo si è concentrato sul sistema scheletrico. (Interesse)

Ragazzo 2 (Angelo): Ah, bellissimo! E cosa avete fatto esattamente? (Curiosità)

Ragazzo 1 (Sara): Abbiamo esaminato le ossa, imparando i loro nomi e le loro funzioni. Abbiamo anche analizzato l'importanza delle articolazioni e dei muscoli che ci consentono di muoverci. Ma la parte più interessante è stata quando abbiamo creato un modello del sistema scheletrico con materiali riciclati. (Entusiasmo)

Ragazzo 2 (Angelo): Che idea fantastica! Sono sicuro che sia stato molto divertente. Come avete realizzato il modello? (Curiosità)

Ragazzo 1 (Sara): Abbiamo utilizzato vari materiali, come cartone, stuzzicadenti e colori. Abbiamo costruito lo scheletro in modo che stesse dritto e che potessimo vedere tutte le parti, come il cranio, le vertebre, le costole e le ossa degli arti. È stato affascinante vedere come tutte queste ossa si collegano e formano la struttura del nostro corpo. (Meraviglia ed eccitazione)

Ragazzo 2 (Angelo): Deve essere stato davvero bello vedere il vostro modello finito. (Ammirazione)

Ragazzo 1 (Sara): Assolutamente! Ogni volta che guardavamo il nostro modello, pensavamo che il nostro corpo era uguale a quello. Inoltre, ci hanno spiegato quanto è importante mangiare bene e fare attività fisica. (Soddisfazione)

Ragazzo 2 (Angelo): Sono sicuro che questa esperienza vi abbia fatto imparare tante cose nuove. È davvero fantastico! (Orgoglio)

Ragazzo 1 (Sara): Grazie, Angelo! È stato un progetto molto importante. Adesso sono ancora più interessata al corpo umano e alle scienze. (Entusiasmo)

LIVELLO: ESCLUSIONE – ADOLESCENTE (14-16)

Ragazzo 1 (Alessandra): Hey, ciao! Mi chiamo Alessandra. E voi?

Ragazzo 2 (Davide): Ciao! Sono Davide, piacere di conoscervi! E tu invece? (Felicità)

Partecipante: (gli avatar guardano il partecipante che si presenta)

Ragazzo 1 (Alessandra): Come state? Avete fatto qualcosa di interessante a scuola ultimamente? (Curiosità)

Ragazzo 2 (Davide): Mmh… Boh non so. L’ultima cosa che mi viene in mente è un progetto scientifico di laboratorio sull’effetto della luce solare sulle piante. Abbiamo visto come la luce influenza la crescita e lo sviluppo delle piante. È stato un argomento interessante da esplorare! (Entusiasmo)

Ragazzo 1 (Alessandra): Mmh, capito. Tu invece?

Partecipante: (gli avatar guardano il partecipante che risponde)

Ragazzo 1 (Alessandra): Ah, okay. Wow, Davide! Il tuo progetto sembra davvero interessante! Come avete strutturato il vostro esperimento? (Curiosità)

Ragazzo 2 (Davide): Abbiamo creato le condizioni adatte di esposizione alla luce solare per un gruppo di piante identiche. Alcune piante sono state poste in piena luce solare, mentre altre sono state collocate in un'area all’ombra. Abbiamo lasciato alcune piante al chiuso, lontano dalla luce solare diretta. Durante l'esperimento, abbiamo misurato la crescita delle piante, il numero di foglie, l'altezza e la salute in generale. Volevamo capire quali sono gli effetti della luce solare sulle piante.

Ragazzo 1 (Alessandra): Wow, sembra davvero un ottimo esperimento! E quali sono state le vostre scoperte? Cosa avete imparato? (Curiosità)

Ragazzo 2 (Davide): È stato davvero interessante! Abbiamo notato che le piante esposte alla luce solare diretta sono cresciute di più rispetto alle piante all’ombra. Le piante esposte alla luce solare avevano fusti più forti e foglie più verdi e grandi. Invece, le piante all’ombra hanno mostrato una crescita più lenta e le foglie erano più pallide. Abbiamo anche osservato che le piante al chiuso sono cresciute molto deboli e con le foglie gialle. (Emozione per la scoperta)

Ragazzo 1 (Alessandra): Wow! Quindi, la luce solare diretta fa crescere e sviluppare meglio le piante. Non avevo mai pensato a quanto fosse importante la luce solare. (Meraviglia)

Ragazzo 2 (Davide): Esattamente! È sorprendente come la luce, che spesso diamo per scontata, giochi un ruolo così importante nella vita delle piante.

Ragazzo 1 (Alessandra): Quindi sei rimasto soddisfatto?

Ragazzo 1 (Davide): Certo! Questo esperimento ci ha permesso di comprendere meglio il rapporto tra le piante e l'ambiente. È come se avessimo svelato un piccolo segreto della natura! (Meraviglia)

Ragazzo 1 (Alessandra): Sono davvero felice che tu abbia condiviso questa esperienza con me, Davide. È fantastico vedere come la scienza ci permetta di scoprire il mondo. (Soddisfazione)

Ragazzo 2 (Davide): Sono contento anch'io di aver potuto condividere il mio progetto con te, Alessandra. Ho scoperto quanto la scienza possa essere appassionante. (Orgoglio)

Ragazzo 1 (Alessandra): Sono pienamente d’accordo! Noi abbiamo fatto un laboratorio scientifico altrettanto interessante. Ci siamo concentrati sugli insiemi e sui grafici. (Interesse)

Ragazzo 2 (Davide): Ah figo! E come ti è sembrato fare gli insiemi e i grafici? (Curiosità)

Ragazzo 1 (Alessandra): È stato difficile ma al tempo stesso appassionante. In ogni insieme abbiamo inserito dei dati. Successivamente, abbiamo utilizzato dei software per analizzare i dati e creare i grafici. È stato incredibile scoprire che i dati possono essere rappresentati con i grafici, che ci hanno permesso di scoprire nuove cose sul fenomeno che stavamo osservando. (Entusiasmo)

Ragazzo 2 (Davide): Interessante! Mi piace l'idea di lavorare con i grafici. Sarebbe fantastico poterci scambiare i nostri lavori per vedere meglio cosa abbiamo fatto! (Entusiasmo)

Ragazzo 1 (Alessandra): Sì, sarebbe davvero interessante! Poi tra di noi abbiamo potuto condividere le nostre esperienze, discutere delle nostre scoperte e imparare ancora di più l'uno dall'altro. (Curiosità)

Ragazzo 2 (Davide): Wow fighissimo! Immagino che vi sia piaciuto. È importante confrontarci e prendere spunto l’uno dall’altro. (Entusiasmo)

Ragazzo 1 (Alessandra): Sono d'accordo! La scienza è molto interessante e dovremmo apprezzarla di più perché ci permette di conoscere noi stessi e il mondo. (Passione)

Ragazzo 2 (Davide): Hai ragione, Alessandra. È meraviglioso vedere come la scienza può aiutarci per imparare cose nuove. (Meraviglia)

Ragazzo 1 (Alessandra): Esattamente! Ci sono tante situazioni in cui si può usare la scienza (Entusiasmo)

Ragazzo 2 (Davide): Sono sicuro che i progetti che abbiamo fatto siano incredibili. È interessante vedere come ogni volta si ottiene un risultato diverso. (Interesse)

# LIVELLO: INCLUSIONE-BAMBINO (8-10)

(Bambino 1 - Andrea): Ciao! Mi chiamo Andrea (entusiasmo). Sono davvero curioso di conoscervi (curiosità)

(Bambino 2 - Clara): Ciao Andrea! Sono Clara (felicità). Anch'io sono felice di conoscervi. E tu come ti chiami? (curiosità)

Partecipante: (gli avatar guardano il partecipante che si presenta)

(Bambino 1 - Andrea): Avete fatto qualcosa interessante a scuola? Qualcosa che vi ha davvero emozionato? (curiosità)

(Bambino 2 - Clara): Beh, effettivamente sì! Mi viene in mente un lavoretto di scienze veramente entusiasmante. Abbiamo costruito un vulcano e l'abbiamo fatto eruttare usando ingredienti speciali. È stato spettacolare! (entusiasmo)

(Bambino 1 – Andrea): Wow! E tu invece?

Partecipante: (gli avatar guardano il partecipante che risponde e continuano a guardarlo riferendosi a lui nelle successive domande)

(Bambino 1 - Andrea): Wow, sembra davvero interessante! Posso chiederti cosa hai fatto nello specifico? (curiosità)

Partecipante: (gli avatar guardano il partecipante che risponde)

(Bambino 2 -Clara): Che bello! E come è stato per te? (Curiosità)

Partecipante: (gli avatar guardano il partecipante che risponde)

(Bambino 1 - Andrea): Immagino. Clara, tu invece cosa hai fatto nello specifico? (curiosità)

(Bambino 2 - Clara): Abbiamo mescolato dei liquidi e delle sostanze che ci hanno dato le maestre e che ci hanno spiegato come mescolare, cosa mettere prima e cosa dopo all'interno del vulcano, e alla fine abbiamo versato dell'acqua calda per fare uscire la lava. È stato fantastico vedere il fumo e la lava finta che uscivano dal vulcano! (entusiasmo)

(Bambino 1 - Andrea): Sembra davvero emozionante! Dev'essere stato molto divertente. Come ti sei sentita quando hai visto la lava che usciva dal vulcano? (curiosità)

(Bambino 2 - Clara): Mi sono sentita così eccitata e felice! Era come se fossi una vera scienziata che faceva esperimenti. Mi piace quando possiamo fare cose pratiche invece di solo ascoltare le maestre. (gioia)

(Bambino 1 - Andrea): Mi fa tanto piacere che sia stato così bello. E tu hai mai fatto un lavoretto di scienze di questo tipo? Ti piacerebbe costruire un vulcano? (Rivolto al partecipante)

Partecipante: (gli avatar guardano il partecipante che risponde)

Bambino 1 – Andrea): Capito. Clara, Hai avuto qualche difficoltà nel costruire il vulcano? (interesse)

(Bambino 2 - Clara): All'inizio ero un po' confusa su come farlo e su come mettere insieme tutti i materiali che le maestre ci avevano dato. Mi sono sentita un po' giù perché volevo che tutto andasse bene. Ma poi ho chiesto aiuto alla maestra e lei mi ha spiegato piano piano come fare. Mi sono sentita meglio quando ho capito come fare. (iniziale confusione, sollievo)

(Bambino 1 - Andrea): Menomale che hai chiesto aiuto e che la tua maestra ti abbia aiutato. (approvazione)

(Bambino 2 - Clara): Si, all’inizio ero un po' timida e non volevo chiedere aiuto, ma poi ho capito che era davvero necessario. Dopo averlo fatto, mi sono sentita molto meglio! (realizzazione, sollievo) Tu invece cosa avresti fatto al posto mio? (Rivolto al partecipante)

Partecipante: (gli avatar guardano il partecipante che risponde)

(Bambino 2 – Clara): Immagino. E tu, Andrea? Hai fatto qualcosa di interessante a scuola? (curiosità)

(Bambino 1 - Andrea): Mmh, l’ultima cosa interessante che mi ricordo è stata una gita nella natura la scorsa settimana. Siamo andati in un parco e abbiamo visto tante piante e animali. È stato meraviglioso! Mi sono sentito felice e meravigliato per tutta la giornata. (felicità, meraviglia)

(Bambino 2 - Clara): Wow, sembra davvero bello! Mi piacerebbe tanto fare una cosa simile. Dev'essere stato davvero interessante. (ammirazione)

(Bambino 1 - Andrea): È stato fantastico! Sono rimasto affascinato dalla bellezza della natura. Era come entrare in un nuovo mondo! (ammirazione, meraviglia) Era come se ci fossero tante cose nuove da vedere che non avevo mai visto prima. Mi sono sentito davvero fortunato a vedere quel parco. (gratitudine)

(Bambino 2 - Clara): Così mi metti troppa curiosità. Tu hai mai fatto una gita simile con la scuola in un parco? (Rivolto al partecipante)

Partecipante: (gli avatar guardano il partecipante che risponde)

(Bambino 2 – Clara): Capisco. Andrea, che tipo di animali hai visto durante la gita? (curiosità)

(Bambino 1 - Andrea): Abbiamo visto tanti animali diversi! C’erano uccelli colorati, scoiattoli che saltellavano tra gli alberi e anche una famiglia di cerbiatti che correvano in mezzo al parco. È stato emozionante poter osservare gli animali così da vicino. (entusiasmo)

(Bambino 2 - Clara): Wow, mi hai fatto venire voglia di fare una gita nel parco anche io! Come ti sei sentito mentre osservavi gli animali? (curiosità)

(Bambino 1 - Andrea): Mi sono sentito incredibilmente fortunato e affascinato. Ogni volta che vedevo un animale e potevo avvicinarmi senza paura mi sentivo un mondo meraviglioso e misterioso. È stata una giornata tutta dentro la natura. (meraviglia, connessione)

(Bambino 2 - Clara): Sembra un'esperienza magica! Vorrei tanto avere la possibilità di guardare gli animali così da vicino. È come vivere dentro la natura. (entusiasmo)

(Bambino 1 - Andrea): È davvero un'avventura straordinaria! Ho scoperto che è bellissimo stare tanto tempo dentro un parco in cui ci sono solo piante e animali. Mi sono sentito tanto fortunato, non sei d’accordo? (apprezzamento)

Partecipante: (gli avatar guardano il partecipante che risponde)

(Bambino 2 - Clara): è proprio vero, sono esperienze bellissime, e mi fa tanto piacere che ci siamo raccontati queste storie! (gratitudine)

(Bambino 1 - Andrea): Anch'io sono felice di aver parlato con voi. È bello parlare delle nostre esperienze e vedere quanto siamo curiosi per il mondo che ci circonda. (soddisfazione)

# LIVELLO: INCLUSIONE - PRE-ADOLESCENTE (11-13)

Ragazzo 1 (Giulia): Ciao! Sono Giulia, e voi? (entusiasmo)

Ragazzo 2 (Eugenio): Ciao! Sono Eugenio, piacere di conoscervi! E tu? (entusiasmo)

Partecipante: (gli avatar guardano il partecipante che si presenta)

Ragazzo 1 (Giulia): Piacere di conoscerti! Cosa hai fatto di bello a scuola?

Partecipante: (gli avatar guardano il partecipante che risponde)

Ragazzo 1 (Giulia): Sembra molto interessante! E cosa hai fatto esattamente?

Partecipante: (gli avatar guardano il partecipante che risponde)

Ragazzo 2 (Eugenio): Figo! E come ti è sembrato?

Partecipante: (gli avatar guardano il partecipante che risponde)

Ragazzo 1 (Giulia): Posso Immaginare. E tu, Eugenio?

Ragazzo 2 (Eugenio): Non so, mi viene in mente che noi l'anno scorso abbiamo fatto una gita al museo di scienze naturali. Abbiamo potuto vedere e imparare cose nuove sulle piante, gli animali e le rocce. È stato molto divertente! (entusiasmo)

Ragazzo 1 (Giulia): Wow, sembra davvero interessante! Mi piacerebbe anche a me poter andare in un museo di scienze naturali. Tu hai mai visto un museo di scienze naturali? (Rivolto al partecipante)

Partecipante: (gli avatar guardano il partecipante che risponde)

Ragazzo 1 (Giulia): Capito. Qual è stata la parte più bella della visita per te, Eugenio? (curiosità)

Ragazzo 2 (Eugenio): Beh, una delle cose più belle è stata vedere i fossili e imparare di più sul nostro pianeta. È incredibile quante cose ci siano nella natura e quanti animali esistano. A te piace la natura? (ammirazione)

Partecipante: (gli avatar guardano il partecipante che risponde)

Ragazzo 1 (Giulia): Mi piace molto guardare gli animali e le piante. La natura è bellissima! Noi invece abbiamo fatto una gita al laboratorio di cucina. Abbiamo imparato a preparare la pasta fatta in casa, gli gnocchi e tanti altri piati. È stato divertente impastare e poi mangiare quello che avevamo fatto! (entusiasmo)

Ragazzo 2 (Eugenio): Che bello! Mi piace l'idea di imparare a cucinare qualcosa di buono da mangiare. A te invece? Ti piace l’idea di cucinare? Hai mai fatto un laboratorio di cucina?

Partecipante: (gli avatar guardano il partecipante che risponde)

Ragazzo 2 (Eugenio): Okay, ti sei divertita?

Ragazzo 1 (Giulia): Sì! Mi sono divertita davvero tanto. È stata una gita diversa dalle altre, e tutto ciò che abbiamo mangiato era ancora più buono sapendo che lo avevamo preparato noi stessi! (entusiasmo)

Ragazzo 2 (Eugenio): Wow, sembra davvero divertente! Cucinare sarà sicuramente un'esperienza unica e vorrei fare anche io questa gita. Cosa avete preparato? (curiosità)

Ragazzo 1 (Giulia): Abbiamo imparato a preparare pasta fatta in casa, gnocchi e tanto altro. Abbiamo usato ingredienti freschi come i funghi e gli spinaci, ma la parte più divertente è stata fare gli gnocchi! (entusiasmo) Ci ha aiutato un bravissimo chef che ci ha spiegato come dovevamo muovere le mani per dare agli gnocchi una perfetta. È stato divertentissimo! (entusiasmo)

Ragazzo 2 (Eugenio): Ti invidio. A noi non ci hanno mai portato in un laboratorio di cucina. Avete mangiato le cose che avete preparato? (curiosità)

Ragazzo 1 (Giulia): Certo! Dopo aver finito di cucinare, abbiamo mangiato tutto. È stata come una ricompensa per il nostro lavoro. Forse ci sembravano ancora più buoni perché li avevamo fatti noi. (soddisfazione) È stata un'esperienza davvero incredibile e soprattutto io e miei compagni abbiamo riso tantissimo. Lo chef ci ha anche spiegato che la cucina fa parte della cultura di ogni regione e che un semplice piatto di pasta può unire anche le persone più diverse. (soddisfazione)

Ragazzo 2 (Eugenio): Hai ragione, pensandoci anche la cucina è importante perché fa parte della tradizione. Cosa ne pensi tu?

Partecipante: (gli avatar guardano il partecipante che risponde)

Ragazzo 2 (Eugenio): Okay, è bello che hai potuto condividere questa esperienza con i tuoi compagni di classe. (apprezzamento). La parte più bella deve essere stata impastare con le tue mani! Ti è sembrato difficile?

Ragazzo 1 (Giulia): Alcune cose erano un po' complicate, ma lo chef aveva molta pazienza e ci è stato sempre dietro. Alla fine, siamo riusciti tutti a preparare dei piatti buonissimi! (soddisfazione)

Ragazzo 2 (Eugenio): Che bello imparare così. Magari un giorno tu e i tuoi compagni potreste cucinare una cena tutti insieme. (entusiasmo)

Ragazzo 1 (Giulia): Sì, sarebbe davvero divertente! Non vedo l'ora! (entusiasmo)

Ragazzo 2 (Eugenio): Che belle esperienze che ci siamo raccontati, sono proprio contento che ci siamo raccontati queste attività!

Ragazzo 1 (Giulia): Anch'io sono felice di aver parlato con voi. È bello parlare delle nostre esperienze e ricordare queste belle emozioni!

# LIVELLO: INCLUSIONE-ADOLESCENTE (14-16)

Ragazzo 1 (Nicola): Ciao! Sono Nicola. Voi come vi chiamate?

Ragazzo 2 (Caterina): Ciao! Sono Caterina, piacere di conoscervi! Tu invece?

Partecipante: (gli avatar si voltano per guardare il partecipante che si presenta)

Ragazzo 1 (Nicola): Piacere di conoscervi! Qual è l'ultima cosa interessante che avete fatto a scuola voi due?

Ragazzo 2 (Caterina): Mmh… Beh, penso che la più interessante sia stata un progetto di scienze dove esploravamo l’ambiente della nostra città. È stato molto figo! (entusiasmo)

Ragazzo 1 (Nicola): Bello! Anche noi abbiamo fatto un progetto figo, però di tecnologia, dove abbiamo programmato e sviluppato un piccolo gioco. Tu invece che hai fatto? (curiosità)

Partecipante: (gli avatar guardano il partecipante che risponde e continuano a guardarlo riferendosi a lui nelle successive domande)

Ragazzo 1 (Nicola): Sembra molto interessante, cos'hai fatto nello specifico? (curiosità)

Partecipante: (gli avatar guardano il partecipante mentre risponde)

Ragazzo 2 (Caterina): Capisco. Ti è piaciuto? Cosa hai provato in quel momento? (curiosità)

Partecipante: (gli avatar guardano il partecipante mentre risponde)

Ragazzo 1 (Nicola): Posso immaginarlo. E tu, Caterina, cos'hai fatto di preciso nel tuo progetto? (curiosità)

Ragazzo 2 (Caterina): Abbiamo imparato a riconoscere le specie di piante e animali presenti nella nostra città. Abbiamo anche visitato un parco naturale per osservare direttamente l'ambiente. È stato davvero interessante scoprire come ogni specie svolge una funzione precisa! (entusiasmo)

Ragazzo 1 (Nicola): Wow, sembra davvero interessante! Mi piace l'idea di esplorare l'ambiente e capire com’è fatto. Tu ha mai fatto qualcosa di simile con la scuola?

Partecipante: (gli avatar guardano il partecipante che risponde)

Ragazzo 1 (Nicola): Capito. Come ti sei sentita durante il progetto? (curiosità)

Ragazzo 2 (Caterina): Mi sono sentita molto coinvolta. Era come essere una vera scienziata, osservare la natura, raccogliere dati e fare esperimenti. Mi è piaciuto anche quando abbiamo ricostruito noi stessi l’ambiente per comprendere meglio come funziona! (entusiasmo)

Ragazzo 1 (Nicola): Bello! Anche il progetto di tecnologia che abbiamo fatto noi è stato altrettanto interessante. Abbiamo creato un piccolo gioco usando gli algoritmi informatici. (entusiasmo)

Ragazzo 2 (Caterina): Top che figo! A noi non ci hanno mai fatto usare gli algoritmi. Voi a scuola avete mai fatto fare qualcosa di informatica?

Partecipante: (gli avatar guardano il partecipante che risponde)

Ragazzo 2 (Caterina): Okay, Nicola, non ti è sembrato difficile quello che avete fatto? (curiosità)

Ragazzo 1 (Nicola): Un po' sì, ad essere sincero, però poi mi sono divertito. È stato divertente creare personaggi, livelli e sfide. Mi è piaciuto anche risolvere i problemi che si presentavano e migliorare il gioco! (entusiasmo)

Ragazzo 2 (Caterina): È davvero interessante! Mi piace l'idea di sviluppare un gioco utilizzando la programmazione. Sarebbe fantastico se lo facessero fare anche a noi. (entusiasmo)

Ragazzo 1 (Nicola): Sì, sarebbe davvero utile, anche come attività alternativa alle solite lezioni scolastiche. Tu cosa ne pensi? (soddisfazione)

Partecipante: (gli avatar guardano il partecipante che risponde)

Ragazzo 1 (Nicola): Capisco, nel frattempo stavo pensando, Caterina, hai mai pensato di proporre questo progetto ai tuoi prof? Potrebbe essere un modo divertente per imparare e mettere in pratica le conoscenze digitali! (curiosità)

Ragazzo 2 (Caterina): Buona idea! Dovremmo sicuramente parlarne con loro e vedere se c'è la possibilità di introdurre un progetto simile nella nostra scuola. Sono convinta che molti dei nostri compagni sarebbero felicissimi di partecipare! A te non farebbe piacere se te lo chiedessero? (entusiasmo)

Partecipante: (gli avatar guardano il partecipante che risponde)

Ragazzo 1 (Nicola): Sono sicuro che se riesci a presentare il progetto in modo convincente, i tuoi prof saranno contenti di darvi questa opportunità. Devi solo assicurarti di essere convincente (determinazione) Tu hai qualche idea per essere convincente?

Partecipante: (gli avatar guardano il partecipante che risponde)

Ragazzo 2 (Caterina): Esatto! Dobbiamo dimostrare loro quanto siamo motivati. Penso che potremmo anche coinvolgere gli altri ragazzi della scuola, formando una piccola squadra per sviluppare il gioco insieme. (entusiasmo)

Ragazzo 1 (Nicola): Sì, sarebbe fantastico lavorare insieme ad altri studenti. Potreste scambiarvi idee, collaborare e imparare ancora di più. Magari potreste persino partecipare a un concorso. (entusiasmo)

Ragazzo 2 (Caterina): Mi piace come stai pensando in grande! Non vedo l'ora di iniziare a organizzare. (determinazione)
